# Supplementary material for: Engineering Gels with Time-Evolving Viscoelasticity
Source: PubMed Central journal article supplement (PMC7014018; doi:10.3390/ma13020438), 2020-01-16
Supplement: materials-13-00438-s001.pdf [file materials-13-00438-s001.pdf]

# Engineering Gels with Time-Evolving Viscoelasticity

The following tables report the data plotted in the graphs in the main text and the results of the statistical analyses (significant differences are highlighted in green).

## 1. First (chemical) crosslinking step (day 0)

|                 | 2.5 mM |      | 5 mM  |      | 10 mM |      | 25 mM |      | 50 mM |      |
|-----------------|--------|------|-------|------|-------|------|-------|------|-------|------|
|                 | Mean   | SEM  | Mean  | SEM  | Mean  | SEM  | Mean  | SEM  | Mean  | SEM  |
| $E_{inst}$ (Pa) | 4604   | 60   | 13920 | 111  | 29090 | 166  | 44110 | 221  | 53180 | 135  |
| $E_{eq}$ (Pa)   | 1564   | 4    | 8480  | 68   | 19165 | 43   | 25573 | 66   | 30745 | 66   |
| $\tau$ (s)      | 0.37   | 0.01 | 0.62  | 0.03 | 0.84  | 0.03 | 1.03  | 0.02 | 1.07  | 0.02 |

### Instantaneous modulus ( $E_{inst}$ )

| Tukey's multiple comparison test |           |                  |              |         |                  |
|----------------------------------|-----------|------------------|--------------|---------|------------------|
|                                  | Mean Diff | 95% CI of diff   | Significant? | Summary | Adjusted P Value |
| 2.5 vs. 5 mM                     | -9316     | -9898 to -8734   | Yes          | ****    | < 0.0001         |
| 2.5 vs. 10 mM                    | -24486    | -25068 to -23904 | Yes          | ****    | < 0.0001         |
| 2.5 vs. 25 mM                    | -39506    | -40088 to -38924 | Yes          | ****    | < 0.0001         |
| 2.5 vs. 50 mM                    | -48576    | -49158 to -47994 | Yes          | ****    | < 0.0001         |
| 5 vs. 10 mM                      | -15170    | -15752 to -14588 | Yes          | ****    | < 0.0001         |
| 5 vs. 25 mM                      | -30190    | -30772 to -29608 | Yes          | ****    | < 0.0001         |
| 5 vs. 50 mM                      | -39260    | -39842 to -38678 | Yes          | ****    | < 0.0001         |
| 10 vs. 25 mM                     | -15020    | -15602 to -14438 | Yes          | ****    | < 0.0001         |
| 10 vs. 50 mM                     | -24090    | -24672 to -23508 | Yes          | ****    | < 0.0001         |
| 25 vs. 50 mM                     | -9070     | -9652 to -8488   | Yes          | ****    | < 0.0001         |

### Equilibrium modulus ( $E_{eq}$ )

| Tukey's multiple comparison test |           |                  |              |         |                  |
|----------------------------------|-----------|------------------|--------------|---------|------------------|
|                                  | Mean Diff | 95% CI of diff   | Significant? | Summary | Adjusted P Value |
| 2.5 vs. 5 mM                     | -6916     | -7132 to -6700   | Yes          | ****    | < 0.0001         |
| 2.5 vs. 10 mM                    | -17601    | -17817 to -17385 | Yes          | ****    | < 0.0001         |
| 2.5 vs. 25 mM                    | -24009    | -24225 to -23793 | Yes          | ****    | < 0.0001         |
| 2.5 vs. 50 mM                    | -29181    | -29397 to -28965 | Yes          | ****    | < 0.0001         |
| 5 vs. 10 mM                      | -10685    | -10901 to -10469 | Yes          | ****    | < 0.0001         |
| 5 vs. 25 mM                      | -17093    | -17309 to -16877 | Yes          | ****    | < 0.0001         |
| 5 vs. 50 mM                      | -22265    | -22481 to -22049 | Yes          | ****    | < 0.0001         |
| 10 vs. 25 mM                     | -6408     | -6624 to -6192   | Yes          | ****    | < 0.0001         |
| 10 vs. 50 mM                     | -11580    | -11796 to -11364 | Yes          | ****    | < 0.0001         |

|              |       |                |     |      |          |
|--------------|-------|----------------|-----|------|----------|
| 25 vs. 50 mM | -5172 | -5388 to -4956 | Yes | **** | < 0.0001 |
|--------------|-------|----------------|-----|------|----------|

Relaxation time  $\tau$  (s)

| Tukey's multiple comparison test |           |                     |              |         |                  |
|----------------------------------|-----------|---------------------|--------------|---------|------------------|
|                                  | Mean Diff | 95% CI of diff      | Significant? | Summary | Adjusted P Value |
| 2.5 vs. 5 mM                     | -0.25     | -0.3409 to -0.1591  | Yes          | ****    | < 0.0001         |
| 2.5 vs. 10 mM                    | -0.47     | -0.5609 to -0.3791  | Yes          | ****    | < 0.0001         |
| 2.5 vs. 25 mM                    | -0.66     | -0.7509 to -0.5691  | Yes          | ****    | < 0.0001         |
| 2.5 vs. 50 mM                    | -0.7      | -0.7909 to -0.6091  | Yes          | ****    | < 0.0001         |
| 5 vs. 10 mM                      | -0.22     | -0.3109 to -0.1291  | Yes          | ****    | < 0.0001         |
| 5 vs. 25 mM                      | -0.41     | -0.5009 to -0.3191  | Yes          | ****    | < 0.0001         |
| 5 vs. 50 mM                      | -0.45     | -0.5409 to -0.3591  | Yes          | ****    | < 0.0001         |
| 10 vs. 25 mM                     | -0.19     | -0.2809 to -0.09909 | Yes          | ****    | < 0.0001         |
| 10 vs. 50 mM                     | -0.23     | -0.3209 to -0.1391  | Yes          | ****    | < 0.0001         |
| 25 vs. 50 mM                     | -0.04     | -0.1309 to 0.05091  | No           | ns      | 0.7414           |

## 2. Second (enzymatic) crosslinking step

### 2.5 mM GTA Gels

- Instantaneous modulus ( $E_{inst}$ )

|         | Day 0     |          | Day 1     |          | Day 4     |          | Day 7     |          |
|---------|-----------|----------|-----------|----------|-----------|----------|-----------|----------|
|         | Mean (Pa) | SEM (Pa) | Mean (Pa) | SEM (Pa) | Mean (Pa) | SEM (Pa) | Mean (Pa) | SEM (Pa) |
| 0 U/g   | 4604      | 60       | 3439      | 39       | 2170      | 17       | 3909      | 129      |
| 1 U/g   | -         | -        | 31810     | 115      | 35850     | 139      | 26835     | 151      |
| 10 U/g  | -         | -        | 59874     | 322      | 62413     | 503      | 59455     | 573      |
| 100 U/g | -         | -        | 62734     | 356      | 84134     | 228      | 82258     | 436      |

| Tukey's multiple comparison test |           |                  |              |         |                  |
|----------------------------------|-----------|------------------|--------------|---------|------------------|
|                                  | Mean Diff | 95% CI of diff   | Significant? | Summary | Adjusted P Value |
| <b>Day 0</b>                     |           |                  |              |         |                  |
| 0 vs. 1 U/g                      | 0         | -975.3 to 975.3  | No           | ns      | > 0.9999         |
| 0 vs. 10 U/g                     | 0         | -975.3 to 975.3  | No           | ns      | > 0.9999         |
| 0 vs. 100 U/g                    | 0         | -975.3 to 975.3  | No           | ns      | > 0.9999         |
| 1 vs. 10 U/g                     | 0         | -975.3 to 975.3  | No           | ns      | > 0.9999         |
| 1 vs. 100 U/g                    | 0         | -975.3 to 975.3  | No           | ns      | > 0.9999         |
| 10 vs. 100 U/g                   | 0         | -975.3 to 975.3  | No           | ns      | > 0.9999         |
| <b>Day 1</b>                     |           |                  |              |         |                  |
| 0 vs. 1 U/g                      | -28371    | -29346 to -27396 | Yes          | ****    | < 0.0001         |

|                |        |                  |     |      |          |
|----------------|--------|------------------|-----|------|----------|
| 0 vs. 10 U/g   | -56435 | -57411 to -55460 | Yes | **** | < 0.0001 |
| 0 vs. 100 U/g  | -59295 | -60270 to -58320 | Yes | **** | < 0.0001 |
| 1 vs. 10 U/g   | -28064 | -29040 to -27089 | Yes | **** | < 0.0001 |
| 1 vs. 100 U/g  | -30924 | -31899 to -29949 | Yes | **** | < 0.0001 |
| 10 vs. 100 U/g | -2860  | -3835 to -1884   | Yes | **** | < 0.0001 |
| <b>Day 4</b>   |        |                  |     |      |          |
| 0 vs. 1 U/g    | -33680 | -34655 to -32705 | Yes | **** | < 0.0001 |
| 0 vs. 10 U/g   | -60244 | -61219 to -59268 | Yes | **** | < 0.0001 |
| 0 vs. 100 U/g  | -81964 | -82939 to -80989 | Yes | **** | < 0.0001 |
| 1 vs. 10 U/g   | -26564 | -27539 to -25588 | Yes | **** | < 0.0001 |
| 1 vs. 100 U/g  | -48284 | -49259 to -47309 | Yes | **** | < 0.0001 |
| 10 vs. 100 U/g | -21720 | -22696 to -20745 | Yes | **** | < 0.0001 |
| <b>Day 7</b>   |        |                  |     |      |          |
| 0 vs. 1 U/g    | -22926 | -23901 to -21951 | Yes | **** | < 0.0001 |
| 0 vs. 10 U/g   | -55546 | -56521 to -54571 | Yes | **** | < 0.0001 |
| 0 vs. 100 U/g  | -78350 | -79325 to -77375 | Yes | **** | < 0.0001 |
| 1 vs. 10 U/g   | -32620 | -33595 to -31645 | Yes | **** | < 0.0001 |
| 1 vs. 100 U/g  | -55424 | -56399 to -54448 | Yes | **** | < 0.0001 |
| 10 vs. 100 U/g | -22804 | -23779 to -21828 | Yes | **** | < 0.0001 |

| Tukey's multiple comparison test |           |                  |              |         |                  |
|----------------------------------|-----------|------------------|--------------|---------|------------------|
|                                  | Mean Diff | 95% CI of diff   | Significant? | Summary | Adjusted P Value |
| 0 U/g                            |           |                  |              |         |                  |
| 0 vs. 1 (day)                    | 1165      | 189.7 to 2140    | Yes          | *       | 0.0118           |
| 0 vs. 4 (day)                    | 2434      | 1459 to 3410     | Yes          | ****    | < 0.0001         |
| 0 vs. 7 (day)                    | 695.4     | -279.9 to 1671   | No           | ns      | 0.2564           |
| 1 vs. 4 (day)                    | 1269      | 294.1 to 2245    | Yes          | **      | 0.0048           |
| 1 vs. 7 (day)                    | -469.6    | -1445 to 505.7   | No           | ns      | 0.6004           |
| 4 vs. 7 (day)                    | -1739     | -2714 to -763.7  | Yes          | ****    | < 0.0001         |
| <b>1 U/g</b>                     |           |                  |              |         |                  |
| 0 vs. 1 (day)                    | -27206    | -28181 to -26231 | Yes          | ****    | < 0.0001         |
| 0 vs. 4 (day)                    | -31246    | -32221 to -30270 | Yes          | ****    | < 0.0001         |
| 0 vs. 7 (day)                    | -22231    | -23206 to -21255 | Yes          | ****    | < 0.0001         |
| 1 vs. 4 (day)                    | -4040     | -5015 to -3064   | Yes          | ****    | < 0.0001         |
| 1 vs. 7 (day)                    | 4975      | 4000 to 5951     | Yes          | ****    | < 0.0001         |
| 4 vs. 7 (day)                    | 9015      | 8040 to 9990     | Yes          | ****    | < 0.0001         |
| <b>10 U/g</b>                    |           |                  |              |         |                  |

|               |        |                  |     |      |          |
|---------------|--------|------------------|-----|------|----------|
| 0 vs. 1 (day) | -55270 | -56246 to -54295 | Yes | **** | < 0.0001 |
| 0 vs. 4 (day) | -57809 | -58785 to -56834 | Yes | **** | < 0.0001 |
| 0 vs. 7 (day) | -54851 | -55826 to -53876 | Yes | **** | < 0.0001 |
| 1 vs. 4 (day) | -2539  | -3514 to -1564   | Yes | **** | < 0.0001 |
| 1 vs. 7 (day) | 419.6  | -555.7 to 1395   | No  | ns   | 0.6837   |
| 4 vs. 7 (day) | 2958   | 1983 to 3934     | Yes | **** | < 0.0001 |
|               |        |                  |     |      |          |
| 100 U/g       |        |                  |     |      |          |
| 0 vs. 1 (day) | -58130 | -59105 to -57155 | Yes | **** | < 0.0001 |
| 0 vs. 4 (day) | -79530 | -80505 to -78554 | Yes | **** | < 0.0001 |
| 0 vs. 7 (day) | -77654 | -78630 to -76679 | Yes | **** | < 0.0001 |
| 1 vs. 4 (day) | -21400 | -22375 to -20424 | Yes | **** | < 0.0001 |
| 1 vs. 7 (day) | -19525 | -20500 to -18549 | Yes | **** | < 0.0001 |
| 4 vs. 7 (day) | 1875   | 899.9 to 2850    | Yes | **** | < 0.0001 |

- Equilibrium modulus ( $E_{eq}$ )

|         | Day 0     |          | Day 1     |          | Day 4     |          | Day 7     |          |
|---------|-----------|----------|-----------|----------|-----------|----------|-----------|----------|
|         | Mean (Pa) | SEM (Pa) | Mean (Pa) | SEM (Pa) | Mean (Pa) | SEM (Pa) | Mean (Pa) | SEM (Pa) |
| 0 U/g   | 1564      | 4        | 1435      | 11       | 1237      | 4        | 1238      | 4        |
| 1 U/g   | -         | -        | 18333     | 46       | 18036     | 62       | 18036     | 62       |
| 10 U/g  | -         | -        | 40312     | 120      | 40299     | 398      | 40299     | 398      |
| 100 U/g | -         | -        | 50849     | 205      | 50096     | 87       | 50096     | 87       |

| Tukey's multiple comparison test |           |                  |              |         |                  |
|----------------------------------|-----------|------------------|--------------|---------|------------------|
|                                  | Mean Diff | 95% CI of diff   | Significant? | Summary | Adjusted P Value |
| <b>Day 0</b>                     |           |                  |              |         |                  |
| 0 vs. 1 U/g                      | 0         | -548.8 to 548.8  | No           | ns      | > 0.9999         |
| 0 vs. 10 U/g                     | 0         | -548.8 to 548.8  | No           | ns      | > 0.9999         |
| 0 vs. 100 U/g                    | 0         | -548.8 to 548.8  | No           | ns      | > 0.9999         |
| 1 vs. 10 U/g                     | 0         | -548.8 to 548.8  | No           | ns      | > 0.9999         |
| 1 vs. 100 U/g                    | 0         | -548.8 to 548.8  | No           | ns      | > 0.9999         |
| 10 vs. 100 U/g                   | 0         | -548.8 to 548.8  | No           | ns      | > 0.9999         |
| <b>Day 1</b>                     |           |                  |              |         |                  |
| 0 vs. 1 U/g                      | -16898    | -17447 to -16350 | Yes          | ****    | < 0.0001         |
| 0 vs. 10 U/g                     | -38877    | -39426 to -38328 | Yes          | ****    | < 0.0001         |
| 0 vs. 100 U/g                    | -49414    | -49963 to -48866 | Yes          | ****    | < 0.0001         |
| 1 vs. 10 U/g                     | -21979    | -22528 to -21430 | Yes          | ****    | < 0.0001         |
| 1 vs. 100 U/g                    | -32516    | -33065 to -31967 | Yes          | ****    | < 0.0001         |
| 10 vs. 100 U/g                   | -10537    | -11086 to -9988  | Yes          | ****    | < 0.0001         |

|                |        |                  |     |      |          |
|----------------|--------|------------------|-----|------|----------|
| <b>Day 4</b>   |        |                  |     |      |          |
| 0 vs. 1 U/g    | -16798 | -17347 to -16249 | Yes | **** | < 0.0001 |
| 0 vs. 10 U/g   | -39061 | -39610 to -38512 | Yes | **** | < 0.0001 |
| 0 vs. 100 U/g  | -48858 | -49407 to -48310 | Yes | **** | < 0.0001 |
| 1 vs. 10 U/g   | -22263 | -22812 to -21714 | Yes | **** | < 0.0001 |
| 1 vs. 100 U/g  | -32061 | -32609 to -31512 | Yes | **** | < 0.0001 |
| 10 vs. 100 U/g | -9798  | -10346 to -9249  | Yes | **** | < 0.0001 |
|                |        |                  |     |      |          |
| <b>Day 7</b>   |        |                  |     |      |          |
| 0 vs. 1 U/g    | -16819 | -17368 to -16270 | Yes | **** | < 0.0001 |
| 0 vs. 10 U/g   | -41566 | -42115 to -41017 | Yes | **** | < 0.0001 |
| 0 vs. 100 U/g  | -49916 | -50465 to -49367 | Yes | **** | < 0.0001 |
| 1 vs. 10 U/g   | -24747 | -25296 to -24198 | Yes | **** | < 0.0001 |
| 1 vs. 100 U/g  | -33097 | -33646 to -32548 | Yes | **** | < 0.0001 |
| 10 vs. 100 U/g | -8350  | -8899 to -7801   | Yes | **** | < 0.0001 |

| Tukey's multiple comparison test |           |                  |              |         |                  |
|----------------------------------|-----------|------------------|--------------|---------|------------------|
|                                  | Mean Diff | 95% CI of diff   | Significant? | Summary | Adjusted P Value |
| <b>0 U/g</b>                     |           |                  |              |         |                  |
| 0 vs. 1 (day)                    | 129       | -419.8 to 677.8  | No           | ns      | 0.9301           |
| 0 vs. 4 (day)                    | 326.2     | -222.6 to 875.0  | No           | ns      | 0.4185           |
| 0 vs. 7 (day)                    | 670.8     | 122.0 to 1220    | Yes          | **      | 0.0094           |
| 1 vs. 4 (day)                    | 197.2     | -351.6 to 746.0  | No           | ns      | 0.7904           |
| 1 vs. 7 (day)                    | 541.8     | -7.046 to 1091   | No           | ns      | 0.0545           |
| 4 vs. 7 (day)                    | 344.6     | -204.3 to 893.4  | No           | ns      | 0.3688           |
|                                  |           |                  |              |         |                  |
| <b>1 U/g</b>                     |           |                  |              |         |                  |
| 0 vs. 1 (day)                    | -16769    | -17318 to -16221 | Yes          | ****    | < 0.0001         |
| 0 vs. 4 (day)                    | -16472    | -17021 to -15923 | Yes          | ****    | < 0.0001         |
| 0 vs. 7 (day)                    | -16148    | -16697 to -15600 | Yes          | ****    | < 0.0001         |
| 1 vs. 4 (day)                    | 297.7     | -251.1 to 846.5  | No           | ns      | 0.5005           |
| 1 vs. 7 (day)                    | 621       | 72.18 to 1170    | Yes          | *       | 0.0193           |
| 4 vs. 7 (day)                    | 323.3     | -225.5 to 872.1  | No           | ns      | 0.4267           |
|                                  |           |                  |              |         |                  |
| <b>10 U/g</b>                    |           |                  |              |         |                  |
| 0 vs. 1 (day)                    | -38748    | -39297 to -38199 | Yes          | ****    | < 0.0001         |
| 0 vs. 4 (day)                    | -38735    | -39284 to -38186 | Yes          | ****    | < 0.0001         |

|                |        |                  |     |      |          |
|----------------|--------|------------------|-----|------|----------|
| 0 vs. 7 (day)  | -40896 | -41444 to -40347 | Yes | **** | < 0.0001 |
| 1 vs. 4 (day)  | 13.42  | -535.4 to 562.2  | No  | ns   | > 0.9999 |
| 1 vs. 7 (day)  | -2147  | -2696 to -1599   | Yes | **** | < 0.0001 |
| 4 vs. 7 (day)  | -2161  | -2710 to -1612   | Yes | **** | < 0.0001 |
| <b>100 U/g</b> |        |                  |     |      |          |
| 0 vs. 1 (day)  | -49285 | -49834 to -48737 | Yes | **** | < 0.0001 |
| 0 vs. 4 (day)  | -48532 | -49081 to -47983 | Yes | **** | < 0.0001 |
| 0 vs. 7 (day)  | -49245 | -49794 to -48697 | Yes | **** | < 0.0001 |
| 1 vs. 4 (day)  | 753.2  | 204.4 to 1302    | Yes | **   | 0.0025   |
| 1 vs. 7 (day)  | 40     | -508.8 to 588.8  | No  | ns   | 0.9976   |
| 4 vs. 7 (day)  | -713.2 | -1262 to -164.4  | Yes | **   | 0.0048   |

- Relaxation time ( $\tau$ )

|         | Day 0    |         | Day 1    |         | Day 4    |         | Day 7    |         |
|---------|----------|---------|----------|---------|----------|---------|----------|---------|
|         | Mean (s) | SEM (s) | Mean (s) | SEM (s) | Mean (s) | SEM (s) | Mean (s) | SEM (s) |
| 0 U/g   | 0.37     | 0.01    | 0.36     | 0.01    | 0.31     | 0.01    | 0.18     | 0.01    |
| 1 U/g   | -        | -       | 0.79     | 0.01    | 0.57     | 0.01    | 0.36     | 0.01    |
| 10 U/g  | -        | -       | 0.90     | 0.03    | 0.73     | 0.05    | 0.50     | 0.04    |
| 100 U/g | -        | -       | 1.03     | 0.09    | 0.91     | 0.014   | 0.62     | 0.02    |

| Tukey's multiple comparison test |           |                     |              |         |                  |
|----------------------------------|-----------|---------------------|--------------|---------|------------------|
|                                  | Mean Diff | 95% CI of diff      | Significant? | Summary | Adjusted P Value |
| <b>Day 0</b>                     |           |                     |              |         |                  |
| 0 vs. 1 U/g                      | 0         | -0.1161 to 0.1161   | No           | ns      | > 0.9999         |
| 0 vs. 10 U/g                     | 0         | -0.1161 to 0.1161   | No           | ns      | > 0.9999         |
| 0 vs. 100 U/g                    | 0         | -0.1161 to 0.1161   | No           | ns      | > 0.9999         |
| 1 vs. 10 U/g                     | 0         | -0.1161 to 0.1161   | No           | ns      | > 0.9999         |
| 1 vs. 100 U/g                    | 0         | -0.1161 to 0.1161   | No           | ns      | > 0.9999         |
| 10 vs. 100 U/g                   | 0         | -0.1161 to 0.1161   | No           | ns      | > 0.9999         |
| <b>Day 1</b>                     |           |                     |              |         |                  |
| 0 vs. 1 U/g                      | -0.4306   | -0.5467 to -0.3145  | Yes          | ****    | < 0.0001         |
| 0 vs. 10 U/g                     | -0.5435   | -0.6596 to -0.4274  | Yes          | ****    | < 0.0001         |
| 0 vs. 100 U/g                    | -0.6685   | -0.7846 to -0.5524  | Yes          | ****    | < 0.0001         |
| 1 vs. 10 U/g                     | -0.1129   | -0.2290 to 0.003229 | No           | ns      | 0.0602           |
| 1 vs. 100 U/g                    | -0.2379   | -0.3540 to -0.1218  | Yes          | ****    | < 0.0001         |

|                |         |                      |     |      |          |
|----------------|---------|----------------------|-----|------|----------|
| 10 vs. 100 U/g | -0.125  | -0.2411 to -0.008940 | Yes | *    | 0.0291   |
| <b>Day 4</b>   |         |                      |     |      |          |
| 0 vs. 1 U/g    | -0.259  | -0.3751 to -0.1429   | Yes | **** | < 0.0001 |
| 0 vs. 10 U/g   | -0.4213 | -0.5374 to -0.3053   | Yes | **** | < 0.0001 |
| 0 vs. 100 U/g  | -0.6063 | -0.7224 to -0.4902   | Yes | **** | < 0.0001 |
| 1 vs. 10 U/g   | -0.1624 | -0.2784 to -0.04626  | Yes | **   | 0.002    |
| 1 vs. 100 U/g  | -0.3473 | -0.4634 to -0.2313   | Yes | **** | < 0.0001 |
| 10 vs. 100 U/g | -0.185  | -0.3011 to -0.06890  | Yes | ***  | 0.0003   |
| <b>Day 7</b>   |         |                      |     |      |          |
| 0 vs. 1 U/g    | -0.1826 | -0.2987 to -0.06646  | Yes | ***  | 0.0003   |
| 0 vs. 10 U/g   | -0.3167 | -0.4328 to -0.2006   | Yes | **** | < 0.0001 |
| 0 vs. 100 U/g  | -0.437  | -0.5531 to -0.3209   | Yes | **** | < 0.0001 |
| 1 vs. 10 U/g   | -0.1341 | -0.2502 to -0.01801  | Yes | *    | 0.0161   |
| 1 vs. 100 U/g  | -0.2544 | -0.3705 to -0.1383   | Yes | **** | < 0.0001 |
| 10 vs. 100 U/g | -0.1203 | -0.2364 to -0.004238 | Yes | *    | 0.0389   |

| Tukey's multiple comparison test |           |                     |              |         |                  |
|----------------------------------|-----------|---------------------|--------------|---------|------------------|
|                                  | Mean Diff | 95% CI of diff      | Significant? | Summary | Adjusted P Value |
| <b>0 U/g</b>                     |           |                     |              |         |                  |
| 0 vs. 1 (day)                    | 0.009539  | -0.1066 to 0.1256   | No           | ns      | 0.9966           |
| 0 vs. 4 (day)                    | 0.06207   | -0.05402 to 0.1782  | No           | ns      | 0.5132           |
| 0 vs. 7 (day)                    | 0.1882    | 0.07207 to 0.3043   | Yes          | ***     | 0.0002           |
| 1 vs. 4 (day)                    | 0.05253   | -0.06356 to 0.1686  | No           | ns      | 0.6479           |
| 1 vs. 7 (day)                    | 0.1786    | 0.06253 to 0.2947   | Yes          | ***     | 0.0005           |
| 4 vs. 7 (day)                    | 0.1261    | 0.009999 to 0.2422  | Yes          | *       | 0.0272           |
| <b>1 U/g</b>                     |           |                     |              |         |                  |
| 0 vs. 1 (day)                    | -0.4211   | -0.5371 to -0.3050  | Yes          | ****    | < 0.0001         |
| 0 vs. 4 (day)                    | -0.1969   | -0.3130 to -0.08083 | Yes          | ****    | < 0.0001         |
| 0 vs. 7 (day)                    | 0.005607  | -0.1105 to 0.1217   | No           | ns      | 0.9993           |
| 1 vs. 4 (day)                    | 0.2241    | 0.1080 to 0.3402    | Yes          | ****    | < 0.0001         |
| 1 vs. 7 (day)                    | 0.4267    | 0.3106 to 0.5428    | Yes          | ****    | < 0.0001         |
| 4 vs. 7 (day)                    | 0.2025    | 0.08644 to 0.3186   | Yes          | ****    | < 0.0001         |
| <b>10 U/g</b>                    |           |                     |              |         |                  |
| 0 vs. 1 (day)                    | -0.5339   | -0.6500 to -0.4178  | Yes          | ****    | < 0.0001         |
| 0 vs. 4 (day)                    | -0.3593   | -0.4754 to -0.2432  | Yes          | ****    | < 0.0001         |
| 0 vs. 7 (day)                    | -0.1285   | -0.2446 to -0.01240 | Yes          | *       | 0.0233           |
| 1 vs. 4 (day)                    | 0.1746    | 0.05855 to 0.2907   | Yes          | ***     | 0.0007           |

|               |         |                     |     |      |          |
|---------------|---------|---------------------|-----|------|----------|
| 1 vs. 7 (day) | 0.4054  | 0.2893 to 0.5215    | Yes | **** | < 0.0001 |
| 4 vs. 7 (day) | 0.2308  | 0.1147 to 0.3469    | Yes | **** | < 0.0001 |
| 100 U/g       |         |                     |     |      |          |
| 0 vs. 1 (day) | -0.659  | -0.7750 to -0.5429  | Yes | **** | < 0.0001 |
| 0 vs. 4 (day) | -0.5443 | -0.6604 to -0.4282  | Yes | **** | < 0.0001 |
| 0 vs. 7 (day) | -0.2488 | -0.3649 to -0.1327  | Yes | **** | < 0.0001 |
| 1 vs. 4 (day) | 0.1147  | -0.001409 to 0.2308 | No  | ns   | 0.0542   |
| 1 vs. 7 (day) | 0.4101  | 0.2940 to 0.5262    | Yes | **** | < 0.0001 |
| 4 vs. 7 (day) | 0.2954  | 0.1793 to 0.4115    | Yes | **** | < 0.0001 |

### 5 mM GTA Gels

- Instantaneous modulus  $E_{inst}$

|         | Day 0     |          | Day 1     |          | Day 4     |          | Day 7     |          |
|---------|-----------|----------|-----------|----------|-----------|----------|-----------|----------|
|         | Mean (Pa) | SEM (Pa) | Mean (Pa) | SEM (Pa) | Mean (Pa) | SEM (Pa) | Mean (Pa) | SEM (Pa) |
| 0 U/g   | 13920     | 111      | 13184     | 83       | 12603     | 72       | 11344     | 64       |
| 1 U/g   | -         | -        | 38898     | 310      | 35559     | 322      | 34935     | 538      |
| 10 U/g  | -         | -        | 74813     | 529      | 75029     | 1289     | 85375     | 1397     |
| 100 U/g | -         | -        | 86294     | 468      | 88376     | 602      | 104550    | 1632     |

| Tukey's multiple comparison test |           |                  |              |         |                  |
|----------------------------------|-----------|------------------|--------------|---------|------------------|
|                                  | Mean Diff | 95% CI of diff   | Significant? | Summary | Adjusted P Value |
| <b>Day 0</b>                     |           |                  |              |         |                  |
| 0 vs. 1 U/g                      | 0         | -2530 to 2530    | No           | ns      | > 0.9999         |
| 0 vs. 10 U/g                     | 0         | -2530 to 2530    | No           | ns      | > 0.9999         |
| 0 vs. 100 U/g                    | 0         | -2530 to 2530    | No           | ns      | > 0.9999         |
| 1 vs. 10 U/g                     | 0         | -2530 to 2530    | No           | ns      | > 0.9999         |
| 1 vs. 100 U/g                    | 0         | -2530 to 2530    | No           | ns      | > 0.9999         |
| 10 vs. 100 U/g                   | 0         | -2530 to 2530    | No           | ns      | > 0.9999         |
| <b>Day 1</b>                     |           |                  |              |         |                  |
| 0 vs. 1 U/g                      | -25714    | -28243 to -23184 | Yes          | ****    | < 0.0001         |
| 0 vs. 10 U/g                     | -61629    | -64159 to -59099 | Yes          | ****    | < 0.0001         |
| 0 vs. 100 U/g                    | -73110    | -75640 to -70580 | Yes          | ****    | < 0.0001         |
| 1 vs. 10 U/g                     | -35915    | -38445 to -33386 | Yes          | ****    | < 0.0001         |
| 1 vs. 100 U/g                    | -47396    | -49926 to -44866 | Yes          | ****    | < 0.0001         |
| 10 vs. 100 U/g                   | -11481    | -14011 to -8951  | Yes          | ****    | < 0.0001         |
| <b>Day 4</b>                     |           |                  |              |         |                  |
| 0 vs. 1 U/g                      | -22955    | -25485 to -20425 | Yes          | ****    | < 0.0001         |



|                |        |                  |     |      |          |
|----------------|--------|------------------|-----|------|----------|
| 0 vs. 10 U/g   | -62426 | -64956 to -59896 | Yes | **** | < 0.0001 |
| 0 vs. 100 U/g  | -75773 | -78303 to -73243 | Yes | **** | < 0.0001 |
| 1 vs. 10 U/g   | -39471 | -42001 to -36941 | Yes | **** | < 0.0001 |
| 1 vs. 100 U/g  | -52818 | -55348 to -50288 | Yes | **** | < 0.0001 |
| 10 vs. 100 U/g | -13347 | -15877 to -10817 | Yes | **** | < 0.0001 |
| <b>Day 7</b>   |        |                  |     |      |          |
| 0 vs. 1 U/g    | -23592 | -26122 to -21062 | Yes | **** | < 0.0001 |
| 0 vs. 10 U/g   | -74032 | -76561 to -71502 | Yes | **** | < 0.0001 |
| 0 vs. 100 U/g  | -93206 | -95736 to -90676 | Yes | **** | < 0.0001 |
| 1 vs. 10 U/g   | -50440 | -52970 to -47910 | Yes | **** | < 0.0001 |
| 1 vs. 100 U/g  | -69614 | -72144 to -67084 | Yes | **** | < 0.0001 |
| 10 vs. 100 U/g | -19174 | -21704 to -16644 | Yes | **** | < 0.0001 |

| Tukey's multiple comparison test |           |                  |              |         |                  |
|----------------------------------|-----------|------------------|--------------|---------|------------------|
|                                  | Mean Diff | 95% CI of diff   | Significant? | Summary | Adjusted P Value |
| <b>0 U/g</b>                     |           |                  |              |         |                  |
| 0 vs. 1 (day)                    | 735.8     | -1794 to 3266    | No           | ns      | 0.8765           |
| 0 vs. 4 (day)                    | 1316      | -1213 to 3846    | No           | ns      | 0.5365           |
| 0 vs. 7 (day)                    | 2576      | 46.32 to 5106    | Yes          | *       | 0.0441           |
| 1 vs. 4 (day)                    | 580.6     | -1949 to 3111    | No           | ns      | 0.9345           |
| 1 vs. 7 (day)                    | 1840      | -689.5 to 4370   | No           | ns      | 0.2398           |
| 4 vs. 7 (day)                    | 1260      | -1270 to 3790    | No           | ns      | 0.5734           |
| <b>1 U/g</b>                     |           |                  |              |         |                  |
| 0 vs. 1 (day)                    | -24978    | -27508 to -22448 | Yes          | ****    | < 0.0001         |
| 0 vs. 4 (day)                    | -21639    | -24169 to -19109 | Yes          | ****    | < 0.0001         |
| 0 vs. 7 (day)                    | -21015    | -23545 to -18486 | Yes          | ****    | < 0.0001         |
| 1 vs. 4 (day)                    | 3339      | 809.2 to 5869    | Yes          | **      | 0.004            |
| 1 vs. 7 (day)                    | 3962      | 1432 to 6492     | Yes          | ***     | 0.0004           |
| 4 vs. 7 (day)                    | 623.1     | -1907 to 3153    | No           | ns      | 0.9206           |
| <b>10 U/g</b>                    |           |                  |              |         |                  |
| 0 vs. 1 (day)                    | -60893    | -63423 to -58363 | Yes          | ****    | < 0.0001         |
| 0 vs. 4 (day)                    | -61109    | -63639 to -58579 | Yes          | ****    | < 0.0001         |
| 0 vs. 7 (day)                    | -71455    | -73985 to -68925 | Yes          | ****    | < 0.0001         |
| 1 vs. 4 (day)                    | -216.1    | -2746 to 2314    | No           | ns      | 0.9962           |
| 1 vs. 7 (day)                    | -10562    | -13092 to -8032  | Yes          | ****    | < 0.0001         |
| 4 vs. 7 (day)                    | -10346    | -12876 to -7816  | Yes          | ****    | < 0.0001         |
| <b>100 U/g</b>                   |           |                  |              |         |                  |

|               |        |                  |     |      |          |
|---------------|--------|------------------|-----|------|----------|
| 0 vs. 1 (day) | -72374 | -74904 to -69844 | Yes | **** | < 0.0001 |
| 0 vs. 4 (day) | -74456 | -76986 to -71926 | Yes | **** | < 0.0001 |
| 0 vs. 7 (day) | -90630 | -93160 to -88100 | Yes | **** | < 0.0001 |
| 1 vs. 4 (day) | -2082  | -4612 to 447.6   | No  | ns   | 0.1474   |
| 1 vs. 7 (day) | -18256 | -20786 to -15726 | Yes | **** | < 0.0001 |
| 4 vs. 7 (day) | -16173 | -18703 to -13644 | Yes | **** | < 0.0001 |

- Equilibrium modulus ( $E_{eq}$ )

|         | Day 0     |          | Day 1     |          | Day 4     |          | Day 7     |          |
|---------|-----------|----------|-----------|----------|-----------|----------|-----------|----------|
|         | Mean (Pa) | SEM (Pa) | Mean (Pa) | SEM (Pa) | Mean (Pa) | SEM (Pa) | Mean (Pa) | SEM (Pa) |
| 0 U/g   | 8480      | 68       | 8596      | 21       | 7667      | 39       | 7487      | 17       |
| 1 U/g   | -         | -        | 27569     | 119      | 24678     | 226      | 25104     | 268      |
| 10 U/g  | -         | -        | 52427     | 293      | 53556     | 943      | 54651     | 933      |
| 100 U/g | -         | -        | 63024     | 280      | 67015     | 226      | 69493     | 1176     |

| Tukey's multiple comparison test |           |                  |              |         |                  |
|----------------------------------|-----------|------------------|--------------|---------|------------------|
|                                  | Mean Diff | 95% CI of diff   | Significant? | Summary | Adjusted P Value |
| <b>Day 0</b>                     |           |                  |              |         |                  |
| 0 vs. 1 U/g                      | 0         | -1710 to 1710    | No           | ns      | > 0.9999         |
| 0 vs. 10 U/g                     | 0         | -1710 to 1710    | No           | ns      | > 0.9999         |
| 0 vs. 100 U/g                    | 0         | -1710 to 1710    | No           | ns      | > 0.9999         |
| 1 vs. 10 U/g                     | 0         | -1710 to 1710    | No           | ns      | > 0.9999         |
| 1 vs. 100 U/g                    | 0         | -1710 to 1710    | No           | ns      | > 0.9999         |
| 10 vs. 100 U/g                   | 0         | -1710 to 1710    | No           | ns      | > 0.9999         |
| <b>Day 1</b>                     |           |                  |              |         |                  |
| 0 vs. 1 U/g                      | -18973    | -20683 to -17262 | Yes          | ****    | < 0.0001         |
| 0 vs. 10 U/g                     | -43831    | -45542 to -42121 | Yes          | ****    | < 0.0001         |
| 0 vs. 100 U/g                    | -54428    | -56139 to -52718 | Yes          | ****    | < 0.0001         |
| 1 vs. 10 U/g                     | -24858    | -26569 to -23148 | Yes          | ****    | < 0.0001         |
| 1 vs. 100 U/g                    | -35456    | -37166 to -33745 | Yes          | ****    | < 0.0001         |
| 10 vs. 100 U/g                   | -10597    | -12308 to -8887  | Yes          | ****    | < 0.0001         |
| <b>Day 4</b>                     |           |                  |              |         |                  |
| 0 vs. 1 U/g                      | -17011    | -18721 to -15301 | Yes          | ****    | < 0.0001         |
| 0 vs. 10 U/g                     | -45889    | -47599 to -44179 | Yes          | ****    | < 0.0001         |
| 0 vs. 100 U/g                    | -59347    | -61058 to -57637 | Yes          | ****    | < 0.0001         |
| 1 vs. 10 U/g                     | -28878    | -30588 to -27168 | Yes          | ****    | < 0.0001         |
| 1 vs. 100 U/g                    | -42336    | -44047 to -40626 | Yes          | ****    | < 0.0001         |
| 10 vs. 100 U/g                   | -13458    | -15169 to -11748 | Yes          | ****    | < 0.0001         |

|                |        |                  |     |      |          |
|----------------|--------|------------------|-----|------|----------|
| Day 7          |        |                  |     |      |          |
| 0 vs. 1 U/g    | -17616 | -19327 to -15906 | Yes | **** | < 0.0001 |
| 0 vs. 10 U/g   | -47163 | -48874 to -45453 | Yes | **** | < 0.0001 |
| 0 vs. 100 U/g  | -62006 | -63716 to -60295 | Yes | **** | < 0.0001 |
| 1 vs. 10 U/g   | -29547 | -31258 to -27837 | Yes | **** | < 0.0001 |
| 1 vs. 100 U/g  | -44389 | -46100 to -42679 | Yes | **** | < 0.0001 |
| 10 vs. 100 U/g | -14842 | -16552 to -13132 | Yes | **** | < 0.0001 |

| Tukey's multiple comparison test |           |                  |              |         |                  |
|----------------------------------|-----------|------------------|--------------|---------|------------------|
|                                  | Mean Diff | 95% CI of diff   | Significant? | Summary | Adjusted P Value |
| 0 U/g                            |           |                  |              |         |                  |
| 0 vs. 1 (day)                    | -116.1    | -1826 to 1594    | No           | ns      | 0.9981           |
| 0 vs. 4 (day)                    | 812.6     | -897.7 to 2523   | No           | ns      | 0.6109           |
| 0 vs. 7 (day)                    | 992.5     | -717.8 to 2703   | No           | ns      | 0.4403           |
| 1 vs. 4 (day)                    | 928.7     | -781.6 to 2639   | No           | ns      | 0.4996           |
| 1 vs. 7 (day)                    | 1109      | -601.7 to 2819   | No           | ns      | 0.3399           |
| 4 vs. 7 (day)                    | 179.9     | -1530 to 1890    | No           | ns      | 0.993            |
| 1 U/g                            |           |                  |              |         |                  |
| 0 vs. 1 (day)                    | -19089    | -20799 to -17379 | Yes          | ****    | < 0.0001         |
| 0 vs. 4 (day)                    | -16198    | -17909 to -14488 | Yes          | ****    | < 0.0001         |
| 0 vs. 7 (day)                    | -16624    | -18334 to -14913 | Yes          | ****    | < 0.0001         |
| 1 vs. 4 (day)                    | 2891      | 1180 to 4601     | Yes          | ****    | < 0.0001         |
| 1 vs. 7 (day)                    | 2465      | 754.8 to 4175    | Yes          | **      | 0.0013           |
| 4 vs. 7 (day)                    | -425.4    | -2136 to 1285    | No           | ns      | 0.9184           |
| 10 U/g                           |           |                  |              |         |                  |
| 0 vs. 1 (day)                    | -43947    | -45658 to -42237 | Yes          | ****    | < 0.0001         |
| 0 vs. 4 (day)                    | -45076    | -46787 to -43366 | Yes          | ****    | < 0.0001         |
| 0 vs. 7 (day)                    | -46171    | -47881 to -44461 | Yes          | ****    | < 0.0001         |
| 1 vs. 4 (day)                    | -1129     | -2839 to 581.2   | No           | ns      | 0.3235           |
| 1 vs. 7 (day)                    | -2224     | -3934 to -513.4  | Yes          | **      | 0.0048           |
| 4 vs. 7 (day)                    | -1095     | -2805 to 615.7   | No           | ns      | 0.3513           |
| 100 U/g                          |           |                  |              |         |                  |
| 0 vs. 1 (day)                    | -54545    | -56255 to -52834 | Yes          | ****    | < 0.0001         |
| 0 vs. 4 (day)                    | -58535    | -60245 to -56824 | Yes          | ****    | < 0.0001         |
| 0 vs. 7 (day)                    | -61013    | -62723 to -59303 | Yes          | ****    | < 0.0001         |
| 1 vs. 4 (day)                    | -3990     | -5700 to -2280   | Yes          | ****    | < 0.0001         |
| 1 vs. 7 (day)                    | -6469     | -8179 to -4758   | Yes          | ****    | < 0.0001         |

|               |       |                 |     |    |        |
|---------------|-------|-----------------|-----|----|--------|
| 4 vs. 7 (day) | -2479 | -4189 to -768.2 | Yes | ** | 0.0012 |
|---------------|-------|-----------------|-----|----|--------|

- Relaxation time ( $\tau$ )

|         | Day 0    |         | Day 1    |         | Day 4    |         | Day 7    |         |
|---------|----------|---------|----------|---------|----------|---------|----------|---------|
|         | Mean (s) | SEM (s) | Mean (s) | SEM (s) | Mean (s) | SEM (s) | Mean (s) | SEM (s) |
| 0 U/g   | 0.62     | 0.03    | 0.65     | 0.02    | 0.52     | 0.02    | 0.36     | 0.01    |
| 1 U/g   | -        | -       | 0.89     | 0.05    | 0.71     | 0.06    | 0.48     | 0.06    |
| 10 U/g  | -        | -       | 1.38     | 0.08    | 0.97     | 0.05    | 0.65     | 0.08    |
| 100 U/g | -        | -       | 1.38     | 0.08    | 1.07     | 0.06    | 0.74     | 0.10    |

| Tukey's multiple comparison test |           |                     |              |         |                  |
|----------------------------------|-----------|---------------------|--------------|---------|------------------|
|                                  | Mean Diff | 95% CI of diff      | Significant? | Summary | Adjusted P Value |
| <b>Day 0</b>                     |           |                     |              |         |                  |
| 0 vs. 1 U/g                      | 0         | -0.2099 to 0.2099   | No           | ns      | > 0.9999         |
| 0 vs. 10 U/g                     | 0         | -0.2099 to 0.2099   | No           | ns      | > 0.9999         |
| 0 vs. 100 U/g                    | 0         | -0.2099 to 0.2099   | No           | ns      | > 0.9999         |
| 1 vs. 10 U/g                     | 0         | -0.2099 to 0.2099   | No           | ns      | > 0.9999         |
| 1 vs. 100 U/g                    | 0         | -0.2099 to 0.2099   | No           | ns      | > 0.9999         |
| 10 vs. 100 U/g                   | 0         | -0.2099 to 0.2099   | No           | ns      | > 0.9999         |
| <b>Day 1</b>                     |           |                     |              |         |                  |
| 0 vs. 1 U/g                      | -0.2441   | -0.4540 to -0.03417 | Yes          | *       | 0.0152           |
| 0 vs. 10 U/g                     | -0.7348   | -0.9447 to -0.5249  | Yes          | ****    | < 0.0001         |
| 0 vs. 100 U/g                    | -0.7326   | -0.9425 to -0.5226  | Yes          | ****    | < 0.0001         |
| 1 vs. 10 U/g                     | -0.4907   | -0.7006 to -0.2808  | Yes          | ****    | < 0.0001         |
| 1 vs. 100 U/g                    | -0.4885   | -0.6984 to -0.2785  | Yes          | ****    | < 0.0001         |
| 10 vs. 100 U/g                   | 0.002233  | -0.2077 to 0.2122   | No           | ns      | > 0.9999         |
| <b>Day 4</b>                     |           |                     |              |         |                  |
| 0 vs. 1 U/g                      | -0.1873   | -0.3972 to 0.02264  | No           | ns      | 0.0994           |
| 0 vs. 10 U/g                     | -0.4444   | -0.6544 to -0.2345  | Yes          | ****    | < 0.0001         |
| 0 vs. 100 U/g                    | -0.5473   | -0.7572 to -0.3373  | Yes          | ****    | < 0.0001         |
| 1 vs. 10 U/g                     | -0.2571   | -0.4671 to -0.04722 | Yes          | **      | 0.0092           |
| 1 vs. 100 U/g                    | -0.36     | -0.5699 to -0.1501  | Yes          | ****    | < 0.0001         |
| 10 vs. 100 U/g                   | -0.1028   | -0.3128 to 0.1071   | No           | ns      | 0.5866           |
| <b>Day 7</b>                     |           |                     |              |         |                  |
| 0 vs. 1 U/g                      | -0.1174   | -0.3273 to 0.09251  | No           | ns      | 0.4734           |
| 0 vs. 10 U/g                     | -0.2866   | -0.4966 to -0.07671 | Yes          | **      | 0.0027           |
| 0 vs. 100 U/g                    | -0.3802   | -0.5901 to -0.1703  | Yes          | ****    | < 0.0001         |

|                |          |                     |     |    |        |
|----------------|----------|---------------------|-----|----|--------|
| 1 vs. 10 U/g   | -0.1692  | -0.3791 to 0.04070  | No  | ns | 0.1616 |
| 1 vs. 100 U/g  | -0.2628  | -0.4727 to -0.05287 | Yes | ** | 0.0073 |
| 10 vs. 100 U/g | -0.09357 | -0.3035 to 0.1164   | No  | ns | 0.6588 |

| Tukey's multiple comparison test |           |                     |              |         |                  |
|----------------------------------|-----------|---------------------|--------------|---------|------------------|
|                                  | Mean Diff | 95% CI of diff      | Significant? | Summary | Adjusted P Value |
| <b>0 U/g</b>                     |           |                     |              |         |                  |
| 0 vs. 1 (day)                    | -0.03041  | -0.2403 to 0.1795   | No           | ns      | 0.9822           |
| 0 vs. 4 (day)                    | 0.09698   | -0.1129 to 0.3069   | No           | ns      | 0.6324           |
| 0 vs. 7 (day)                    | 0.2556    | 0.04568 to 0.4655   | Yes          | **      | 0.0097           |
| 1 vs. 4 (day)                    | 0.1274    | -0.08253 to 0.3373  | No           | ns      | 0.3997           |
| 1 vs. 7 (day)                    | 0.286     | 0.07609 to 0.4959   | Yes          | **      | 0.0027           |
| 4 vs. 7 (day)                    | 0.1586    | -0.05130 to 0.3685  | No           | ns      | 0.2093           |
| <b>1 U/g</b>                     |           |                     |              |         |                  |
| 0 vs. 1 (day)                    | -0.2745   | -0.4844 to -0.06458 | Yes          | **      | 0.0045           |
| 0 vs. 4 (day)                    | -0.0903   | -0.3002 to 0.1196   | No           | ns      | 0.6839           |
| 0 vs. 7 (day)                    | 0.1382    | -0.07173 to 0.3481  | No           | ns      | 0.326            |
| 1 vs. 4 (day)                    | 0.1842    | -0.02572 to 0.3941  | No           | ns      | 0.1084           |
| 1 vs. 7 (day)                    | 0.4127    | 0.2028 to 0.6226    | Yes          | ****    | < 0.0001         |
| 4 vs. 7 (day)                    | 0.2285    | 0.01857 to 0.4384   | Yes          | *       | 0.0267           |
| <b>10 U/g</b>                    |           |                     |              |         |                  |
| 0 vs. 1 (day)                    | -0.7652   | -0.9751 to -0.5553  | Yes          | ****    | < 0.0001         |
| 0 vs. 4 (day)                    | -0.3474   | -0.5574 to -0.1375  | Yes          | ***     | 0.0001           |
| 0 vs. 7 (day)                    | -0.03103  | -0.2410 to 0.1789   | No           | ns      | 0.9811           |
| 1 vs. 4 (day)                    | 0.4178    | 0.2078 to 0.6277    | Yes          | ****    | < 0.0001         |
| 1 vs. 7 (day)                    | 0.7342    | 0.5243 to 0.9441    | Yes          | ****    | < 0.0001         |
| 4 vs. 7 (day)                    | 0.3164    | 0.1065 to 0.5263    | Yes          | ***     | 0.0007           |
| <b>100 U/g</b>                   |           |                     |              |         |                  |
| 0 vs. 1 (day)                    | -0.763    | -0.9729 to -0.5531  | Yes          | ****    | < 0.0001         |
| 0 vs. 4 (day)                    | -0.4503   | -0.6602 to -0.2404  | Yes          | ****    | < 0.0001         |
| 0 vs. 7 (day)                    | -0.1246   | -0.3345 to 0.08533  | No           | ns      | 0.4198           |
| 1 vs. 4 (day)                    | 0.3127    | 0.1028 to 0.5226    | Yes          | ***     | 0.0008           |
| 1 vs. 7 (day)                    | 0.6384    | 0.4285 to 0.8483    | Yes          | ****    | < 0.0001         |
| 4 vs. 7 (day)                    | 0.3257    | 0.1158 to 0.5356    | Yes          | ***     | 0.0004           |

### 10 mM GTA Gels

- Instantaneous modulus  $E_{inst}$

|         | Day 0     |          | Day 1     |          | Day 4     |          | Day 7     |          |
|---------|-----------|----------|-----------|----------|-----------|----------|-----------|----------|
|         | Mean (Pa) | SEM (Pa) | Mean (Pa) | SEM (Pa) | Mean (Pa) | SEM (Pa) | Mean (Pa) | SEM (Pa) |
| 0 U/g   | 29090     | 166      | 28875     | 221      | 27610     | 115      | 26789     | 148      |
| 1 U/g   | -         | -        | 62818     | 277      | 60399     | 2091     | 74821     | 498      |
| 10 U/g  | -         | -        | 81576     | 347      | 94723     | 653      | 115954    | 1118     |
| 100 U/g | -         | -        | 67786     | 468      | 106552    | 1256     | 103745    | 6838     |

| Tukey's multiple comparison test |           |                  |              |         |                  |
|----------------------------------|-----------|------------------|--------------|---------|------------------|
|                                  | Mean Diff | 95% CI of diff   | Significant? | Summary | Adjusted P Value |
| <b>Day 0</b>                     |           |                  |              |         |                  |
| 0 vs. 1 U/g                      | 0         | -6779 to 6779    | No           | ns      | > 0.9999         |
| 0 vs. 10 U/g                     | 0         | -6779 to 6779    | No           | ns      | > 0.9999         |
| 0 vs. 100 U/g                    | 0         | -6779 to 6779    | No           | ns      | > 0.9999         |
| 1 vs. 10 U/g                     | 0         | -6779 to 6779    | No           | ns      | > 0.9999         |
| 1 vs. 100 U/g                    | 0         | -6779 to 6779    | No           | ns      | > 0.9999         |
| 10 vs. 100 U/g                   | 0         | -6779 to 6779    | No           | ns      | > 0.9999         |
| <b>Day 1</b>                     |           |                  |              |         |                  |
| 0 vs. 1 U/g                      | -33943    | -40721 to -27164 | Yes          | ****    | < 0.0001         |
| 0 vs. 10 U/g                     | -52701    | -59479 to -45922 | Yes          | ****    | < 0.0001         |
| 0 vs. 100 U/g                    | -38911    | -45689 to -32132 | Yes          | ****    | < 0.0001         |
| 1 vs. 10 U/g                     | -18758    | -25536 to -11979 | Yes          | ****    | < 0.0001         |
| 1 vs. 100 U/g                    | -4968     | -11747 to 1811   | No           | ns      | 0.2337           |
| 10 vs. 100 U/g                   | 13790     | 7011 to 20568    | Yes          | ****    | < 0.0001         |
| <b>Day 4</b>                     |           |                  |              |         |                  |
| 0 vs. 1 U/g                      | -32790    | -39568 to -26011 | Yes          | ****    | < 0.0001         |
| 0 vs. 10 U/g                     | -67113    | -73892 to -60335 | Yes          | ****    | < 0.0001         |
| 0 vs. 100 U/g                    | -78942    | -85721 to -72163 | Yes          | ****    | < 0.0001         |
| 1 vs. 10 U/g                     | -34324    | -41102 to -27545 | Yes          | ****    | < 0.0001         |
| 1 vs. 100 U/g                    | -46152    | -52931 to -39374 | Yes          | ****    | < 0.0001         |
| 10 vs. 100 U/g                   | -11829    | -18607 to -5050  | Yes          | ****    | < 0.0001         |
| <b>Day 7</b>                     |           |                  |              |         |                  |
| 0 vs. 1 U/g                      | -48032    | -54811 to -41254 | Yes          | ****    | < 0.0001         |
| 0 vs. 10 U/g                     | -89165    | -95943 to -82386 | Yes          | ****    | < 0.0001         |
| 0 vs. 100 U/g                    | -76957    | -83735 to -70178 | Yes          | ****    | < 0.0001         |
| 1 vs. 10 U/g                     | -41133    | -47911 to -34354 | Yes          | ****    | < 0.0001         |
| 1 vs. 100 U/g                    | -28924    | -35703 to -22146 | Yes          | ****    | < 0.0001         |
| 10 vs. 100 U/g                   | 12208     | 5430 to 18987    | Yes          | ****    | < 0.0001         |

| Tukey's multiple comparison test |           |                  |              |         |                  |
|----------------------------------|-----------|------------------|--------------|---------|------------------|
|                                  | Mean Diff | 95% CI of diff   | Significant? | Summary | Adjusted P Value |
| <b>0 U/g</b>                     |           |                  |              |         |                  |
| 0 vs. 1 (day)                    | 214.9     | -6564 to 6993    | No           | ns      | 0.9998           |
| 0 vs. 4 (day)                    | 1480      | -5299 to 8259    | No           | ns      | 0.9429           |
| 0 vs. 7 (day)                    | 2301      | -4477 to 9080    | No           | ns      | 0.8175           |
| 1 vs. 4 (day)                    | 1265      | -5513 to 8044    | No           | ns      | 0.9632           |
| 1 vs. 7 (day)                    | 2086      | -4692 to 8865    | No           | ns      | 0.8572           |
| 4 vs. 7 (day)                    | 821.1     | -5957 to 7600    | No           | ns      | 0.9894           |
| <b>1 U/g</b>                     |           |                  |              |         |                  |
| 0 vs. 1 (day)                    | -33728    | -40506 to -26949 | Yes          | ****    | < 0.0001         |
| 0 vs. 4 (day)                    | -31310    | -38088 to -24531 | Yes          | ****    | < 0.0001         |
| 0 vs. 7 (day)                    | -45731    | -52510 to -38953 | Yes          | ****    | < 0.0001         |
| 1 vs. 4 (day)                    | 2418      | -4360 to 9197    | No           | ns      | 0.7941           |
| 1 vs. 7 (day)                    | -12003    | -18782 to -5225  | Yes          | ****    | < 0.0001         |
| 4 vs. 7 (day)                    | -14421    | -21200 to -7643  | Yes          | ****    | < 0.0001         |
| <b>10 U/g</b>                    |           |                  |              |         |                  |
| 0 vs. 1 (day)                    | -52486    | -59264 to -45707 | Yes          | ****    | < 0.0001         |
| 0 vs. 4 (day)                    | -65633    | -72412 to -58855 | Yes          | ****    | < 0.0001         |
| 0 vs. 7 (day)                    | -86864    | -93642 to -80085 | Yes          | ****    | < 0.0001         |
| 1 vs. 4 (day)                    | -13148    | -19926 to -6369  | Yes          | ****    | < 0.0001         |
| 1 vs. 7 (day)                    | -34378    | -41157 to -27600 | Yes          | ****    | < 0.0001         |
| 4 vs. 7 (day)                    | -21231    | -28009 to -14452 | Yes          | ****    | < 0.0001         |
| <b>100 U/g</b>                   |           |                  |              |         |                  |
| 0 vs. 1 (day)                    | -38696    | -45474 to -31917 | Yes          | ****    | < 0.0001         |
| 0 vs. 4 (day)                    | -77462    | -84241 to -70683 | Yes          | ****    | < 0.0001         |
| 0 vs. 7 (day)                    | -74656    | -81434 to -67877 | Yes          | ****    | < 0.0001         |
| 1 vs. 4 (day)                    | -38766    | -45545 to -31988 | Yes          | ****    | < 0.0001         |
| 1 vs. 7 (day)                    | -35960    | -42738 to -29181 | Yes          | ****    | < 0.0001         |
| 4 vs. 7 (day)                    | 2807      | -3972 to 9585    | No           | ns      | 0.7093           |

- Equilibrium modulus ( $E_{eq}$ )

|        | Day 0     |          | Day 1     |          | Day 4     |          | Day 7     |          |
|--------|-----------|----------|-----------|----------|-----------|----------|-----------|----------|
|        | Mean (Pa) | SEM (Pa) | Mean (Pa) | SEM (Pa) | Mean (Pa) | SEM (Pa) | Mean (Pa) | SEM (Pa) |
| 0 U/g  | 19165     | 43       | 19699     | 67       | 17709     | 30       | 16817     | 24       |
| 1 U/g  | -         | -        | 43271     | 91       | 43054     | 1709     | 44303     | 211      |
| 10 U/g | -         | -        | 64867     | 228      | 67267     | 410      | 68333     | 570      |

|         |   |   |       |     |       |     |       |      |
|---------|---|---|-------|-----|-------|-----|-------|------|
| 100 U/g | - | - | 58810 | 230 | 61027 | 962 | 64968 | 5872 |
|---------|---|---|-------|-----|-------|-----|-------|------|

| Tukey's multiple comparison test |           |                  |              |         |                  |
|----------------------------------|-----------|------------------|--------------|---------|------------------|
|                                  | Mean Diff | 95% CI of diff   | Significant? | Summary | Adjusted P Value |
| <b>Day 0</b>                     |           |                  |              |         |                  |
| 0 vs. 1 U/g                      | 0         | -5695 to 5695    | No           | ns      | > 0.9999         |
| 0 vs. 10 U/g                     | 0         | -5695 to 5695    | No           | ns      | > 0.9999         |
| 0 vs. 100 U/g                    | 0         | -5695 to 5695    | No           | ns      | > 0.9999         |
| 1 vs. 10 U/g                     | 0         | -5695 to 5695    | No           | ns      | > 0.9999         |
| 1 vs. 100 U/g                    | 0         | -5695 to 5695    | No           | ns      | > 0.9999         |
| 10 vs. 100 U/g                   | 0         | -5695 to 5695    | No           | ns      | > 0.9999         |
| <b>Day 1</b>                     |           |                  |              |         |                  |
| 0 vs. 1 U/g                      | -23573    | -29268 to -17878 | Yes          | ****    | < 0.0001         |
| 0 vs. 10 U/g                     | -45169    | -50864 to -39474 | Yes          | ****    | < 0.0001         |
| 0 vs. 100 U/g                    | -39112    | -44807 to -33416 | Yes          | ****    | < 0.0001         |
| 1 vs. 10 U/g                     | -21596    | -27291 to -15901 | Yes          | ****    | < 0.0001         |
| 1 vs. 100 U/g                    | -15539    | -21234 to -9844  | Yes          | ****    | < 0.0001         |
| 10 vs. 100 U/g                   | 6057      | 362.1 to 11752   | Yes          | *       | 0.0321           |
| <b>Day 4</b>                     |           |                  |              |         |                  |
| 0 vs. 1 U/g                      | -25345    | -31040 to -19650 | Yes          | ****    | < 0.0001         |
| 0 vs. 10 U/g                     | -49559    | -55254 to -43864 | Yes          | ****    | < 0.0001         |
| 0 vs. 100 U/g                    | -43319    | -49014 to -37624 | Yes          | ****    | < 0.0001         |
| 1 vs. 10 U/g                     | -24214    | -29909 to -18519 | Yes          | ****    | < 0.0001         |
| 1 vs. 100 U/g                    | -17974    | -23669 to -12279 | Yes          | ****    | < 0.0001         |
| 10 vs. 100 U/g                   | 6240      | 545.2 to 11935   | Yes          | *       | 0.0253           |
| <b>Day 7</b>                     |           |                  |              |         |                  |
| 0 vs. 1 U/g                      | -27486    | -33181 to -21791 | Yes          | ****    | < 0.0001         |
| 0 vs. 10 U/g                     | -51516    | -57211 to -45821 | Yes          | ****    | < 0.0001         |
| 0 vs. 100 U/g                    | -48151    | -53846 to -42456 | Yes          | ****    | < 0.0001         |
| 1 vs. 10 U/g                     | -24030    | -29725 to -18335 | Yes          | ****    | < 0.0001         |
| 1 vs. 100 U/g                    | -20665    | -26360 to -14970 | Yes          | ****    | < 0.0001         |
| 10 vs. 100 U/g                   | 3365      | -2330 to 9060    | No           | ns      | 0.4239           |

| Tukey's multiple comparison test |           |                |              |         |                  |
|----------------------------------|-----------|----------------|--------------|---------|------------------|
|                                  | Mean Diff | 95% CI of diff | Significant? | Summary | Adjusted P Value |
| 0 U/g                            |           |                |              |         |                  |
| 0 vs. 1 (day)                    | -533.8    | -6229 to 5161  | No           | ns      | 0.995            |



|               |        |                  |     |      |          |
|---------------|--------|------------------|-----|------|----------|
| 0 vs. 4 (day) | 1456   | -4239 to 7151    | No  | ns   | 0.9122   |
| 0 vs. 7 (day) | 2348   | -3347 to 8043    | No  | ns   | 0.7119   |
| 1 vs. 4 (day) | 1990   | -3705 to 7685    | No  | ns   | 0.8042   |
| 1 vs. 7 (day) | 2882   | -2813 to 8577    | No  | ns   | 0.56     |
| 4 vs. 7 (day) | 892.3  | -4803 to 6587    | No  | ns   | 0.9777   |
| 1 U/g         |        |                  |     |      |          |
| 0 vs. 1 (day) | -24107 | -29802 to -18412 | Yes | **** | < 0.0001 |
| 0 vs. 4 (day) | -23889 | -29584 to -18194 | Yes | **** | < 0.0001 |
| 0 vs. 7 (day) | -25138 | -30833 to -19443 | Yes | **** | < 0.0001 |
| 1 vs. 4 (day) | 217.7  | -5477 to 5913    | No  | ns   | 0.9997   |
| 1 vs. 7 (day) | -1031  | -6726 to 4664    | No  | ns   | 0.9662   |
| 4 vs. 7 (day) | -1249  | -6944 to 4446    | No  | ns   | 0.9422   |
| 10 U/g        |        |                  |     |      |          |
| 0 vs. 1 (day) | -45702 | -51397 to -40007 | Yes | **** | < 0.0001 |
| 0 vs. 4 (day) | -48103 | -53798 to -42408 | Yes | **** | < 0.0001 |
| 0 vs. 7 (day) | -49168 | -54863 to -43473 | Yes | **** | < 0.0001 |
| 1 vs. 4 (day) | -2400  | -8095 to 3295    | No  | ns   | 0.6975   |
| 1 vs. 7 (day) | -3465  | -9160 to 2230    | No  | ns   | 0.3972   |
| 4 vs. 7 (day) | -1065  | -6760 to 4630    | No  | ns   | 0.963    |
| 100 U/g       |        |                  |     |      |          |
| 0 vs. 1 (day) | -39645 | -45340 to -33950 | Yes | **** | < 0.0001 |
| 0 vs. 4 (day) | -41863 | -47558 to -36168 | Yes | **** | < 0.0001 |
| 0 vs. 7 (day) | -45803 | -51498 to -40108 | Yes | **** | < 0.0001 |
| 1 vs. 4 (day) | -2217  | -7912 to 3478    | No  | ns   | 0.747    |
| 1 vs. 7 (day) | -6157  | -11852 to -462.3 | Yes | *    | 0.0282   |
| 4 vs. 7 (day) | -3940  | -9635 to 1755    | No  | ns   | 0.2822   |

- Relaxation time ( $\tau$ )

|         | Day 0    |         | Day 1    |         | Day 4    |         | Day 7    |         |
|---------|----------|---------|----------|---------|----------|---------|----------|---------|
|         | Mean (s) | SEM (s) | Mean (s) | SEM (s) | Mean (s) | SEM (s) | Mean (s) | SEM (s) |
| 0 U/g   | 0.84     | 0.03    | 0.76     | 0.04    | 0.66     | 0.01    | 0.45     | 0.01    |
| 1 U/g   | -        | -       | 0.93     | 0.03    | 0.64     | 0.07    | 0.49     | 0.02    |
| 10 U/g  | -        | -       | 1.28     | 0.08    | 0.85     | 0.06    | 0.70     | 0.04    |
| 100 U/g | -        | -       | 1.33     | 0.12    | 0.92     | 0.07    | 0.73     | 0.07    |

| Tukey's multiple comparison test |           |                     |              |         |                  |
|----------------------------------|-----------|---------------------|--------------|---------|------------------|
|                                  | Mean Diff | 95% CI of diff      | Significant? | Summary | Adjusted P Value |
| <b>Day 0</b>                     |           |                     |              |         |                  |
| 0 vs. 1 U/g                      | 0         | -0.1955 to 0.1955   | No           | ns      | > 0.9999         |
| 0 vs. 10 U/g                     | 0         | -0.1955 to 0.1955   | No           | ns      | > 0.9999         |
| 0 vs. 100 U/g                    | 0         | -0.1955 to 0.1955   | No           | ns      | > 0.9999         |
| 1 vs. 10 U/g                     | 0         | -0.1955 to 0.1955   | No           | ns      | > 0.9999         |
| 1 vs. 100 U/g                    | 0         | -0.1955 to 0.1955   | No           | ns      | > 0.9999         |
| 10 vs. 100 U/g                   | 0         | -0.1955 to 0.1955   | No           | ns      | > 0.9999         |
| <b>Day 1</b>                     |           |                     |              |         |                  |
| 0 vs. 1 U/g                      | -0.1755   | -0.3710 to 0.01995  | No           | ns      | 0.096            |
| 0 vs. 10 U/g                     | -0.5238   | -0.7193 to -0.3283  | Yes          | ****    | < 0.0001         |
| 0 vs. 100 U/g                    | -0.5713   | -0.7668 to -0.3758  | Yes          | ****    | < 0.0001         |
| 1 vs. 10 U/g                     | -0.3483   | -0.5437 to -0.1528  | Yes          | ****    | < 0.0001         |
| 1 vs. 100 U/g                    | -0.3958   | -0.5912 to -0.2003  | Yes          | ****    | < 0.0001         |
| 10 vs. 100 U/g                   | -0.04751  | -0.2430 to 0.1480   | No           | ns      | 0.9234           |
| <b>Day 4</b>                     |           |                     |              |         |                  |
| 0 vs. 1 U/g                      | 0.02253   | -0.1729 to 0.2180   | No           | ns      | 0.9909           |
| 0 vs. 10 U/g                     | -0.1907   | -0.3861 to 0.004801 | No           | ns      | 0.0589           |
| 0 vs. 100 U/g                    | -0.2571   | -0.4525 to -0.06159 | Yes          | **      | 0.0042           |
| 1 vs. 10 U/g                     | -0.2132   | -0.4087 to -0.01772 | Yes          | *       | 0.0263           |
| 1 vs. 100 U/g                    | -0.2796   | -0.4751 to -0.08412 | Yes          | **      | 0.0014           |
| 10 vs. 100 U/g                   | -0.06639  | -0.2619 to 0.1291   | No           | ns      | 0.8173           |
| <b>Day 7</b>                     |           |                     |              |         |                  |
| 0 vs. 1 U/g                      | -0.04535  | -0.2408 to 0.1501   | No           | ns      | 0.9325           |
| 0 vs. 10 U/g                     | -0.2616   | -0.4571 to -0.06611 | Yes          | **      | 0.0034           |
| 0 vs. 100 U/g                    | -0.2907   | -0.4862 to -0.09524 | Yes          | ***     | 0.0008           |
| 1 vs. 10 U/g                     | -0.2162   | -0.4117 to -0.02077 | Yes          | *       | 0.0234           |
| 1 vs. 100 U/g                    | -0.2454   | -0.4408 to -0.04989 | Yes          | **      | 0.0071           |
| 10 vs. 100 U/g                   | -0.02913  | -0.2246 to 0.1663   | No           | ns      | 0.9807           |

| Tukey's multiple comparison test |           |                    |              |         |                  |
|----------------------------------|-----------|--------------------|--------------|---------|------------------|
|                                  | Mean Diff | 95% CI of diff     | Significant? | Summary | Adjusted P Value |
| <b>0 U/g</b>                     |           |                    |              |         |                  |
| 0 vs. 1 (day)                    | 0.07997   | -0.1155 to 0.2754  | No           | ns      | 0.7169           |
| 0 vs. 4 (day)                    | 0.1755    | -0.01999 to 0.3710 | No           | ns      | 0.0961           |
| 0 vs. 7 (day)                    | 0.3937    | 0.1982 to 0.5891   | Yes          | ****    | < 0.0001         |

|                      |          |                    |     |      |          |
|----------------------|----------|--------------------|-----|------|----------|
| <b>1 vs. 4 (day)</b> | 0.09551  | -0.09996 to 0.2910 | No  | ns   | 0.5887   |
| <b>1 vs. 7 (day)</b> | 0.3137   | 0.1182 to 0.5092   | Yes | ***  | 0.0002   |
| <b>4 vs. 7 (day)</b> | 0.2182   | 0.02270 to 0.4136  | Yes | *    | 0.0217   |
|                      |          |                    |     |      |          |
| <b>1 U/g</b>         |          |                    |     |      |          |
| <b>0 vs. 1 (day)</b> | -0.09555 | -0.2910 to 0.09992 | No  | ns   | 0.5884   |
| <b>0 vs. 4 (day)</b> | 0.198    | 0.002536 to 0.3935 | Yes | *    | 0.0458   |
| <b>0 vs. 7 (day)</b> | 0.3483   | 0.1528 to 0.5438   | Yes | **** | < 0.0001 |
| <b>1 vs. 4 (day)</b> | 0.2936   | 0.09809 to 0.4890  | Yes | ***  | 0.0007   |
| <b>1 vs. 7 (day)</b> | 0.4439   | 0.2484 to 0.6393   | Yes | **** | < 0.0001 |
| <b>4 vs. 7 (day)</b> | 0.1503   | -0.04517 to 0.3458 | No  | ns   | 0.1959   |
|                      |          |                    |     |      |          |
| <b>10 U/g</b>        |          |                    |     |      |          |
| <b>0 vs. 1 (day)</b> | -0.4438  | -0.6393 to -0.2483 | Yes | **** | < 0.0001 |
| <b>0 vs. 4 (day)</b> | -0.01519 | -0.2107 to 0.1803  | No  | ns   | 0.9971   |
| <b>0 vs. 7 (day)</b> | 0.1321   | -0.06340 to 0.3275 | No  | ns   | 0.3029   |
| <b>1 vs. 4 (day)</b> | 0.4286   | 0.2331 to 0.6241   | Yes | **** | < 0.0001 |
| <b>1 vs. 7 (day)</b> | 0.5759   | 0.3804 to 0.7714   | Yes | **** | < 0.0001 |
| <b>4 vs. 7 (day)</b> | 0.1473   | -0.04821 to 0.3427 | No  | ns   | 0.2117   |
|                      |          |                    |     |      |          |
| <b>100 U/g</b>       |          |                    |     |      |          |
| <b>0 vs. 1 (day)</b> | -0.4913  | -0.6868 to -0.2958 | Yes | **** | < 0.0001 |
| <b>0 vs. 4 (day)</b> | -0.08158 | -0.2771 to 0.1139  | No  | ns   | 0.7041   |
| <b>0 vs. 7 (day)</b> | 0.1029   | -0.09253 to 0.2984 | No  | ns   | 0.5262   |
| <b>1 vs. 4 (day)</b> | 0.4097   | 0.2143 to 0.6052   | Yes | **** | < 0.0001 |
| <b>1 vs. 7 (day)</b> | 0.5943   | 0.3988 to 0.7897   | Yes | **** | < 0.0001 |
| <b>4 vs. 7 (day)</b> | 0.1845   | -0.01095 to 0.3800 | No  | ns   | 0.0722   |
